# Supplementary material for: Antiatherosclerotic Phenotype of Perivascular Adipose Tissue Surrounding the Saphenous Vein in Coronary Artery Bypass Grafting
Source: PubMed Central journal article supplement — J Am Heart Assoc. 2021 Mar 28;10(7):e018905. doi: 10.1161/JAHA.120.018905 (PMC8174366; doi:10.1161/jaha.120.018905), 2021-03-28
Supplement: JAH3-10-e018905-s001.pdf [file JAH3-10-e018905-s001.pdf]

# **SUPPLEMENTAL MATERIAL**

**Table S1. Primers for human genes in quantitative real-time PCR.**

| <i>Genes</i>       | Accession #  | Forward primer             |     | Reverse primer              |     | Amplicon size (bp) |
|--------------------|--------------|----------------------------|-----|-----------------------------|-----|--------------------|
| <i>18s</i>         | M10098       | 5'-GTAACCCGTTGAACCCATT     | -3' | 5'-CCATCCAATCGGTAGTAGCG     | -3' | 151                |
| <i>Adiponectin</i> | NM_004797    | 5'-GTCATGACCAGGAAACCAC     | -3' | 5'-TTCACCGATGTCTCCCTTAGG    | -3' | 203                |
| <i>Asc</i>         | NM_145182    | 5'-TGGATGCTCTGTACGGGAAG    | -3' | 5'-CCAGGCTGGTGTGAAACTGAA    | -3' | 110                |
| <i>Cd11c</i>       | NM_000887    | 5'-CTGCAAGGGTTTACATACACGG  | -3' | 5'-GAATTTTGGCGGCATCCCTAC    | -3' | 97                 |
| <i>Cd68</i>        | NM_001040059 | 5'-CTTCTCTCATTCCCCTATGGACA | -3' | 5'-GAAGGACACATTGACTCCACC    | -3' | 105                |
| <i>Cd163</i>       | NM_004244    | 5'-GCGGGAGAGTGGAAGTGAAAG   | -3' | 5'-GTTACAAATCACAGAGACCGCT   | -3' | 89                 |
| <i>Cd206</i>       | NM_002438    | 5'-GGGTTGCTATCACTCTCTATGC  | -3' | 5'-TTTCTTGCTGTTGCCGTAGTT    | -3' | 126                |
| <i>Chop</i>        | NM_004083    | 5'-GGAGAACCAGGAAACGGAAAC   | -3' | 5'-TCTCCTTCATGCGCTGCTTT     | -3' | 69                 |
| <i>Emx2</i>        | NM_004098    | 5'-CGGCACTCAGCTACGCTAAC    | -3' | 5'-CAAGTCCGGGTTGGAGTAGAC    | -3' | 107                |
| <i>En1</i>         | NM_001426    | 5'-GAGCGCAGGGCACCAAATA     | -3' | 5'-CGAGTCAGTTTTGACCACGG     | -3' | 92                 |
| <i>Grp78</i>       | NM_005347    | 5'-CATCACGCCGTCCTATGTCG    | -3' | 5'-CGTCAAAGACCGTGTTCTCG     | -3' | 104                |
| <i>Hoxa5</i>       | NM_019102    | 5'-AACTCATTTTGCGGTCGCTAT   | -3' | 5'-TCCCTGAATTGCTCGCTCAC     | -3' | 89                 |
| <i>Il1b</i>        | NM_000576    | 5'-CACGATGCACCTGTACGATCA   | -3' | 5'-GTTGCTCCATATCCTGTCCCT    | -3' | 121                |
| <i>Il6</i>         | NM_000600    | 5'-AAATTCGGTACATCCTCGACGG  | -3' | 5'-GGAAGGTTTCAGGTTGTTTTCTGC | -3' | 112                |
| <i>Il10</i>        | NM_000572    | 5'-GACTTTAAGGGTTACCTGGGTTG | -3' | 5'-TCACATGCGCCTTGATGTCTG    | -3' | 112                |
| <i>Mcp1</i>        | NM_002982    | 5'-CAGCCAGATGCAATCAATGCC   | -3' | 5'-TGGAATCCTGAACCCACTTCT    | -3' | 190                |
| <i>Mincle</i>      | NM_014358    | 5'-CTGAAACACAATGCACAGAGAGA | -3' | 5'-AAAGATGCGAAATGTCACAACAC  | -3' | 128                |
| <i>Nlrp3</i>       | NM_001127462 | 5'-GATCTTCGCTGCGATCAACAG   | -3' | 5'-CGTGCATTATCTGAACCCAC     | -3' | 81                 |
| <i>Pdgfb</i>       | NM_033016.2  | 5'-CTCGATCCGCTCCTTTGATGA   | -3' | 5'-CGTTGGTGCGGTCTATGAG      | -3' | 239                |
| <i>Tgfb</i>        | NM_000660    | 5'-CAAGCAGAGTACACACAGCAT   | -3' | 5'-TGCTCCACTTTTAACTTGAGCC   | -3' | 126                |
| <i>Timp1</i>       | NM_003254    | 5'-CTTCTGCAATTCCGACCTCGT   | -3' | 5'-ACGCTGGTATAAGGTGGTCTG    | -3' | 79                 |
| <i>Tnfa</i>        | NM_000594    | 5'-GAGGCCAAGCCCTGGTATG     | -3' | 5'-CGGGCCGATTGATCTCAGC      | -3' | 91                 |

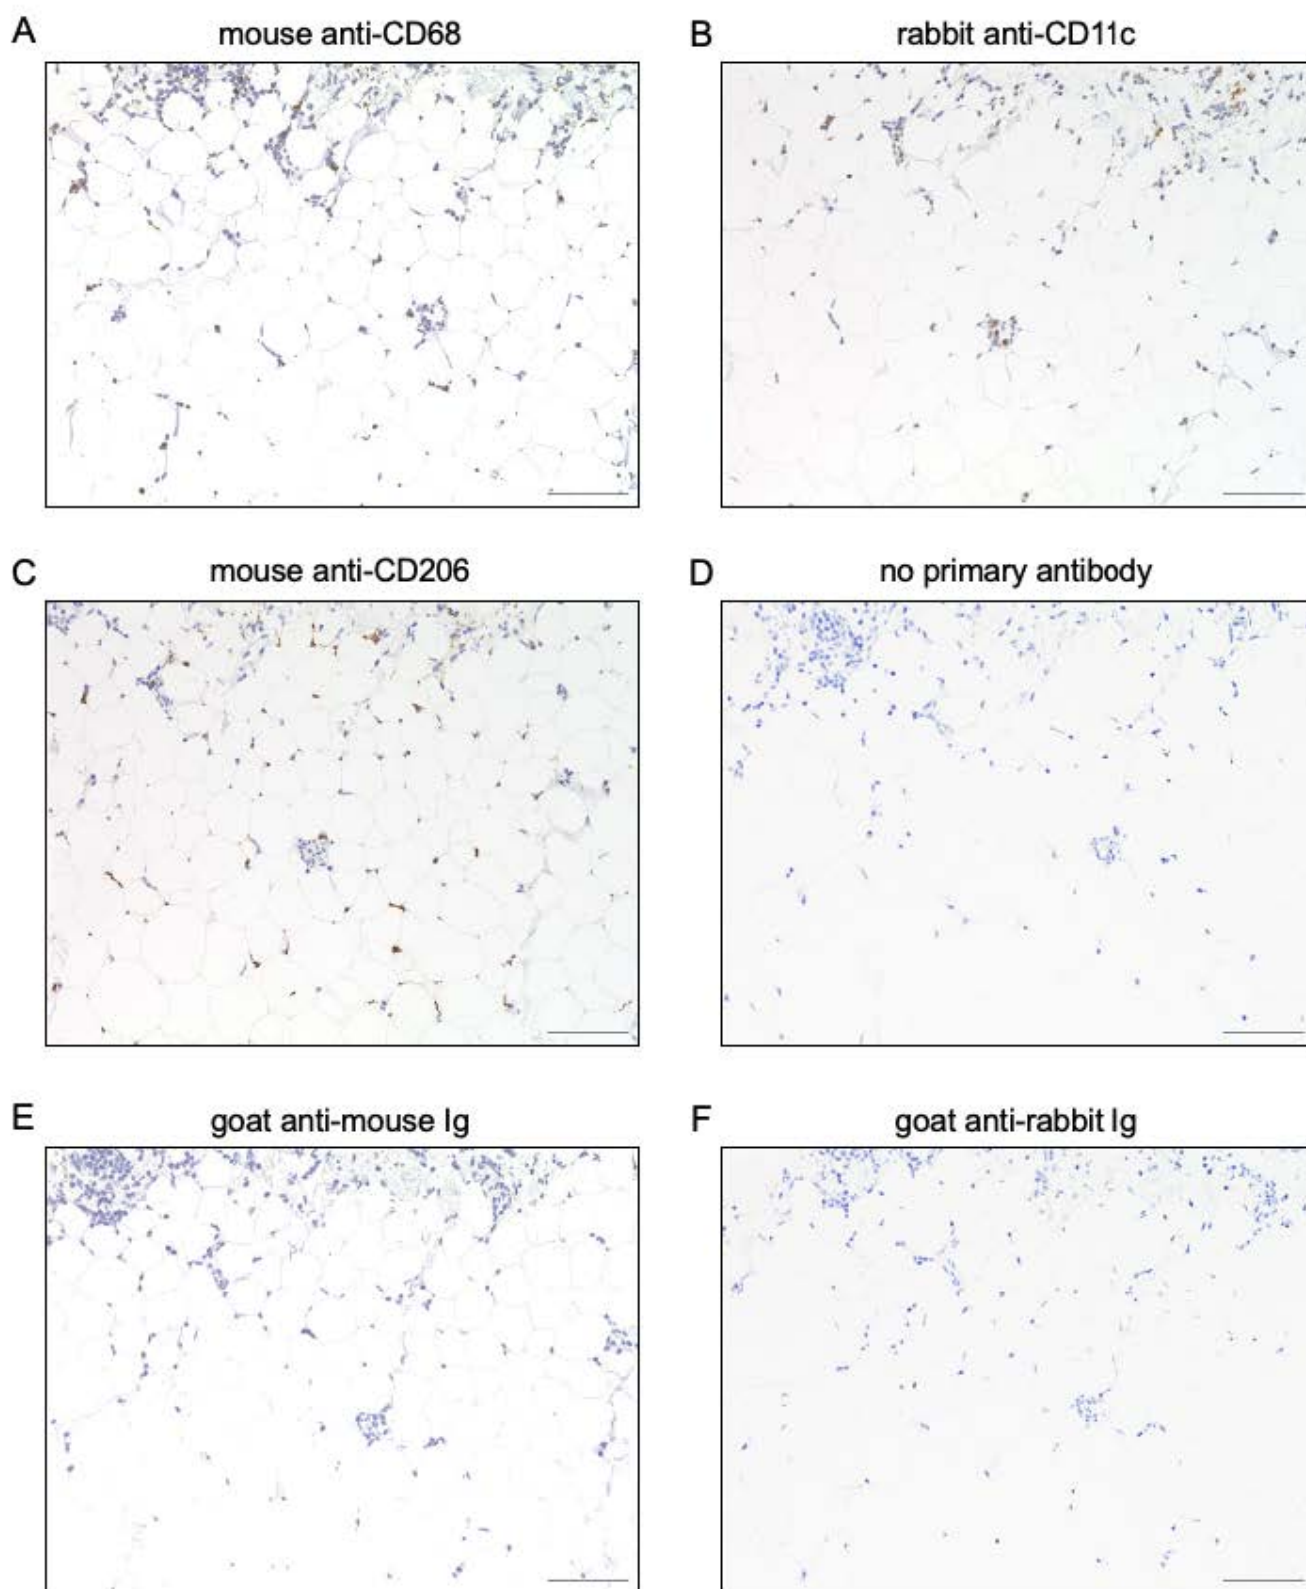

**Figure S1. Control experiments of immunohistological staining.**

**A-C.** Representative immunohistological staining using mouse anti-CD68 (A), rabbit anti-CD11c (B) and mouse anti-CD206 (C) primary antibodies in perivascular adipose tissue surrounding the aorta (Ao-PVAT). **D-F.** Representative immunohistological staining in the absence of a primary antibody (D) and using control primary antibodies of goat anti-mouse immunoglobulins (Ig) (E) and goat anti-rabbit Ig (F) in Ao-PVAT. Scale bar: 100  $\mu$ m.

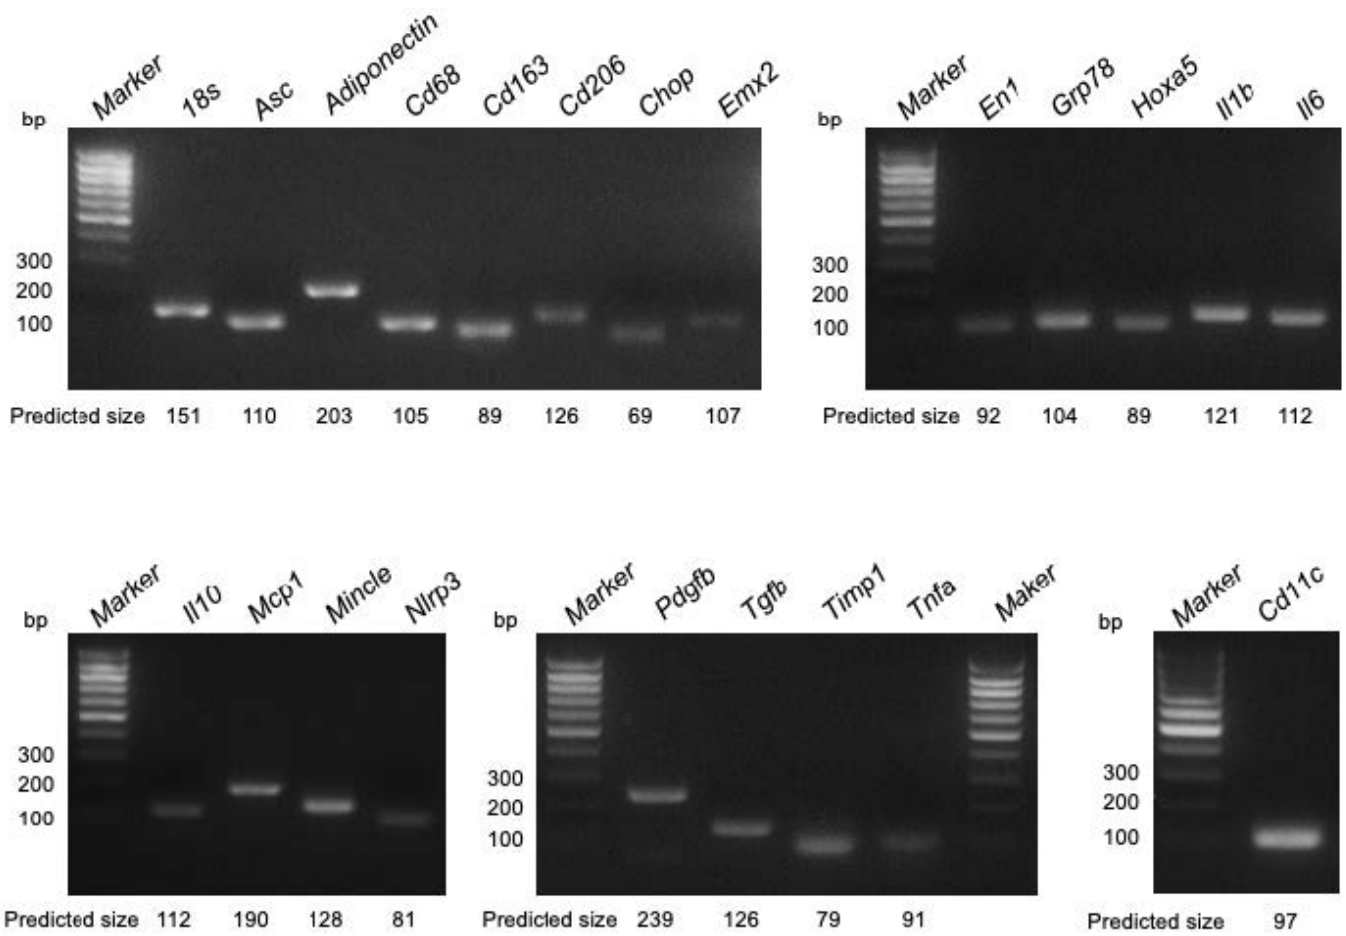

**Figure S2. Images of PCR amplicons in 2% agarose gels.**

The specificity of the PCR reaction of genes was confirmed by one distinct band, which matched with the predicted size of the PCR amplicon.
